# Supplementary material for: Four new zinc(ii) diphosphonates obtained via an ionothermal route: crystal structures and phase transformation behaviour
Source: Royal Society of Chemistry journal article supplement (doi:10.1039/c7ce00400a), 2017-01-01
Supplement: c7ce00400a1.pdf [file c7ce00400a1.pdf]

**Four new zinc (II) diphosphonates obtained via an ionothermal route:  
crystal structures and phase transformation behaviour**

Li Zhang<sup>a</sup>, Sanying Li<sup>a</sup>, Lei Liu<sup>a\*</sup>, Jinxiang Dong<sup>a</sup> and Zhi Lin<sup>b\*</sup>

<sup>a</sup> Research Institute of Special Chemicals, College of Chemistry and Chemical Engineering,  
Taiyuan University of Technology Taiyuan 030024, Shanxi, China. Email: liulei@tyut.edu.cn.

<sup>b</sup> Department of Chemistry, CICECO, University of Aveiro, 3810-193 Aveiro, Portugal.

**Supplementary Information**

**Table S1** The elemental analysis results four compounds

| Compound                 | I     |      |       |       |  | II    |      |       |       |  |
|--------------------------|-------|------|-------|-------|--|-------|------|-------|-------|--|
| Element                  | C     | H    | Zn    | P     |  | C     | H    | Zn    | P     |  |
| Theoretical Value (wt.%) | 24.46 | 2.05 | 33.29 | 15.78 |  | 22.41 | 2.82 | 30.49 | 14.46 |  |
| Observed value (wt.%)    | 24.15 | 1.79 | 33.80 | 16.49 |  | 22.79 | 2.91 | 31.08 | 15.01 |  |

  

| Compound                 | III   |      |       |       |      | IV    |      |       |       |      |
|--------------------------|-------|------|-------|-------|------|-------|------|-------|-------|------|
| Element                  | C     | H    | Zn    | P     | Na   | C     | H    | Zn    | P     | Na   |
| Theoretical Value (wt.%) | 23.95 | 2.51 | 24.45 | 15.46 | 5.73 | 25.39 | 3.17 | 17.27 | 16.38 | 6.08 |
| Observed value (wt.%)    | 24.21 | 2.59 | 25.08 | 16.15 | 6.10 | 25.40 | 3.30 | 17.96 | 16.99 | 6.67 |

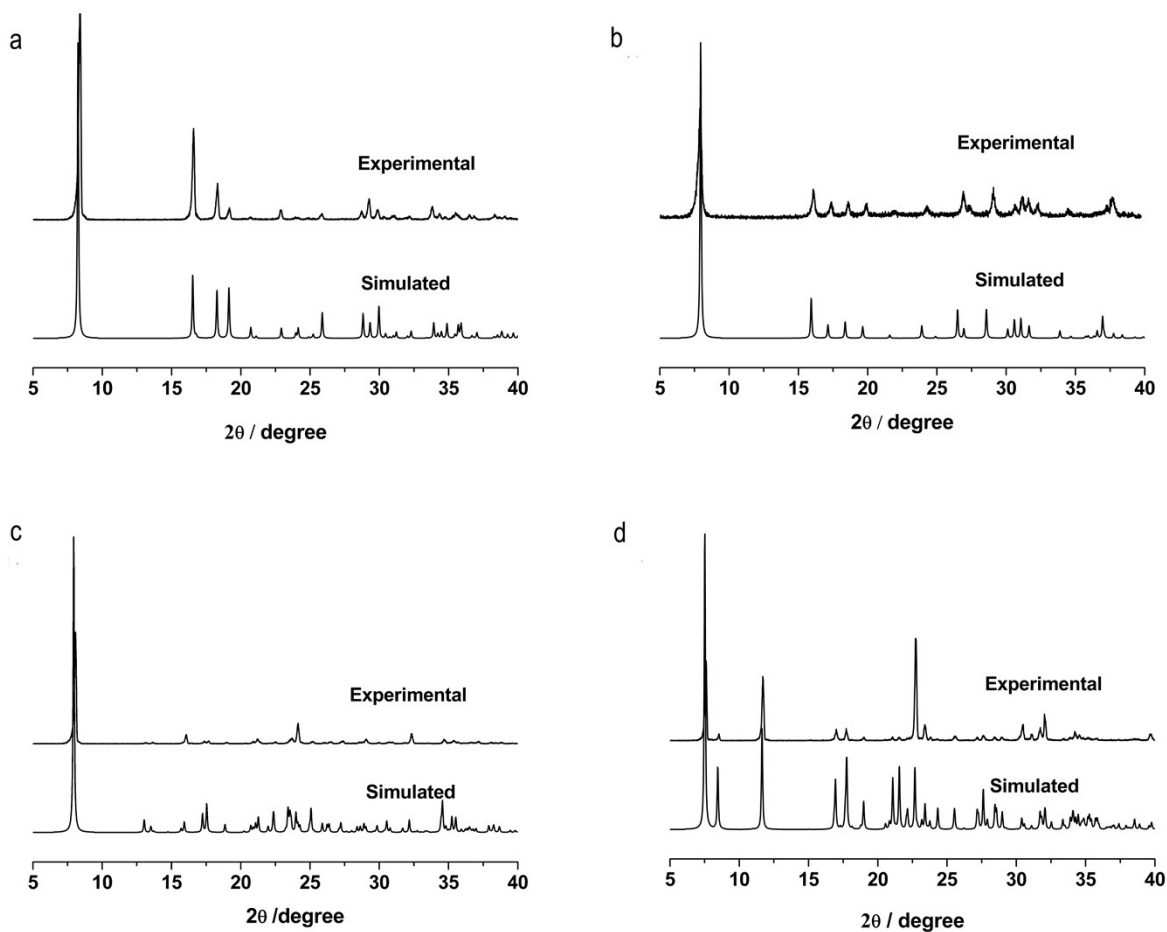

**Figure S1.** Simulated and experimental powder XRD patterns of compound I (a), II (b), III (c) and IV (d).

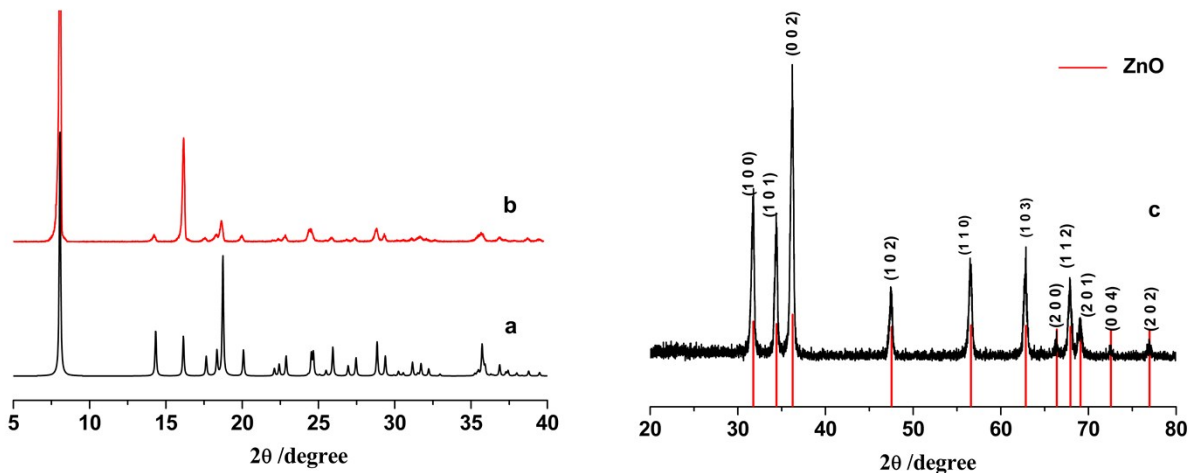

**Figure S2.** Powder XRD patterns of compound  $\text{Zn}[\text{HO}_3\text{PCH}_2(\text{C}_6\text{H}_4)\text{CH}_2\text{PO}_3\text{H}]$  (a), experimental result with water as solvent(b), and experimental  $\text{ZnO}$ (c).

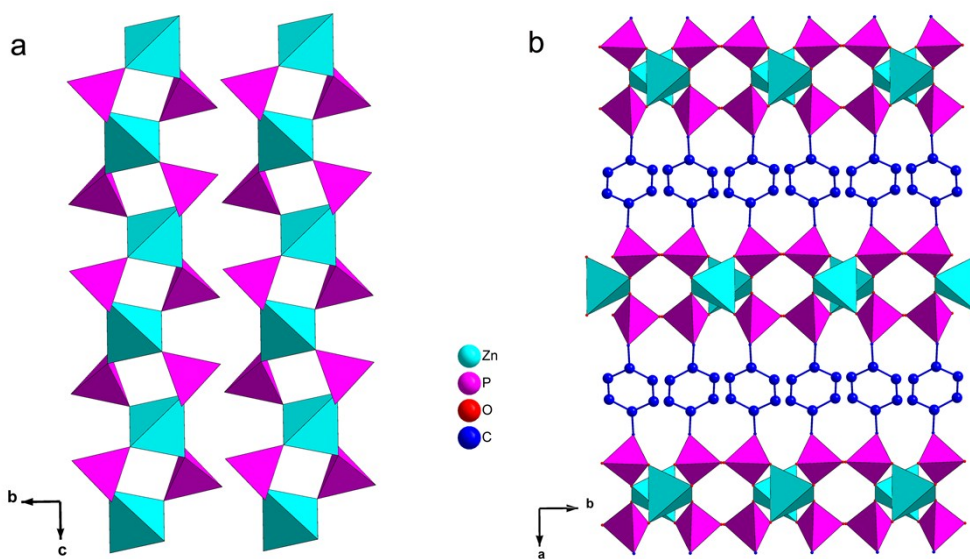

**Figure S3.** (a) Polyhedron representations of the 1D linear inorganic chain of compound  $\text{Zn}[\text{HO}_3\text{PCH}_2(\text{C}_6\text{H}_4)\text{CH}_2\text{PO}_3\text{H}]$  running along  $a$ -axis. (b) Three-dimensional structure of compound  $\text{Zn}[\text{HO}_3\text{PCH}_2(\text{C}_6\text{H}_4)\text{CH}_2\text{PO}_3\text{H}]$  in  $[001]$  direction<sup>[1]</sup>.

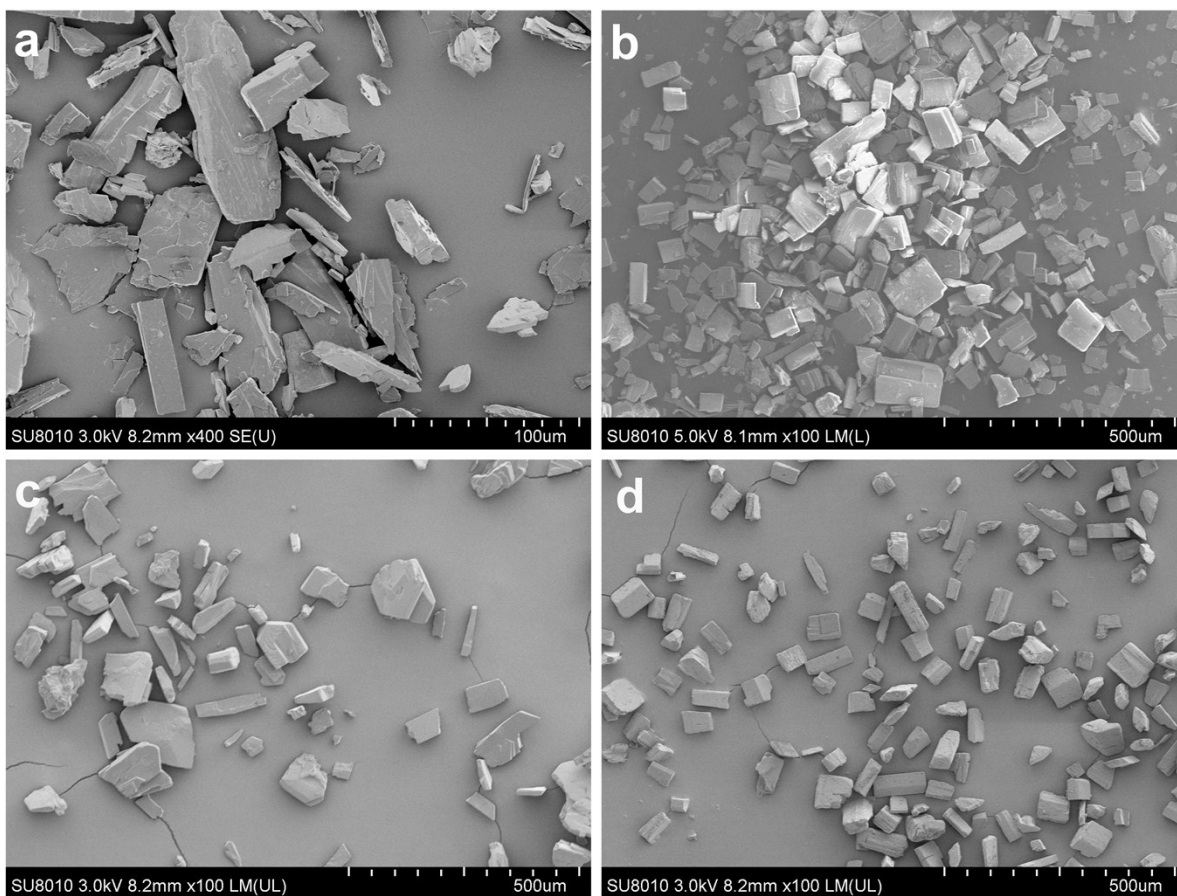

**Figure S4.** SEM images of compound I (a), II (b), III (c) and IV (d).

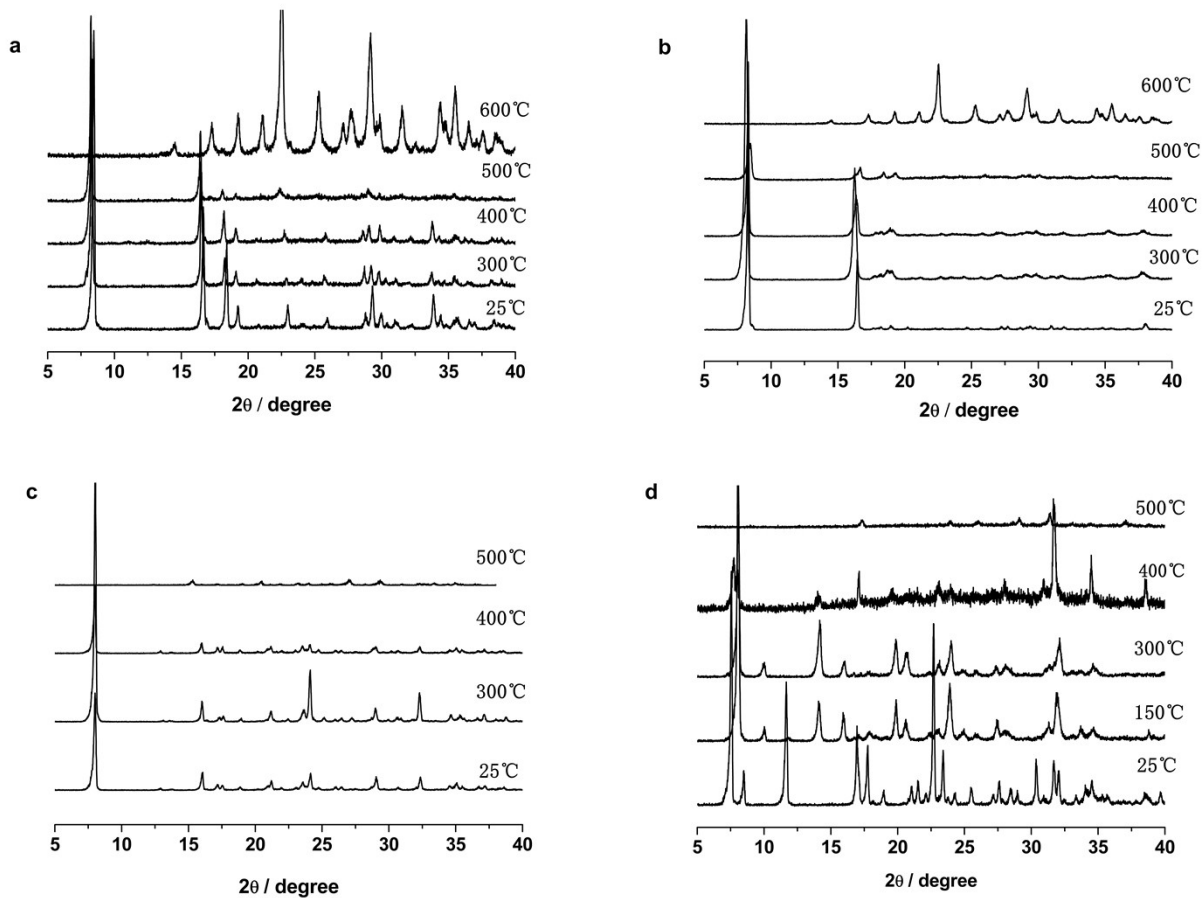

**Figure S5.** Powder XRD patterns of compound I (a), II (b), III (c) and IV (d) after calcination at different temperature.

## References

- 1 X. Z. Xu, P. Wang, R. Hao, M. N. Gan, F. X. Sun and G. S. Zhu, *Solid State Sci.*, 2009, **11**, 68.
